# Supplementary material for: Multiscale and multimodal evaluation of autosomal dominant polycystic kidney disease development
Source: PubMed Central journal article supplement — Commun Biol. 2024 Sep 19;7:1183. doi: 10.1038/s42003-024-06868-1 (PMC11412990; doi:10.1038/s42003-024-06868-1), 2024-09-19

Supplementary Figure 1: Examples of two cysts merging together after their dividing wall has been disrupted, observed in H&E histology images.

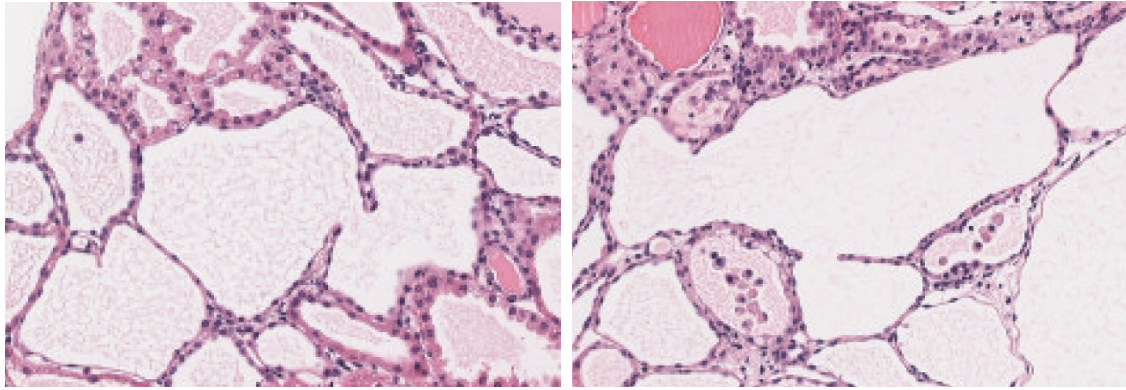

Supplement: 42003_2024_6868_MOESM2_ESM.pdf [file 42003_2024_6868_MOESM2_ESM.pdf]
