# Supplementary material for: Multiscale and multimodal evaluation of autosomal dominant polycystic kidney disease development
Source: PubMed Central journal article supplement — Commun Biol. 2024 Sep 19;7:1183. doi: 10.1038/s42003-024-06868-1 (PMC11412990; doi:10.1038/s42003-024-06868-1), 2024-09-19
Supplement: 42003_2024_6868_MOESM3_ESM.pdf [file 42003_2024_6868_MOESM3_ESM.pdf]

## Description of Additional Supplementary Files

**File name:** Supplementary Data

**Description:** The numerical data supporting all graphs
